# Supplementary figures and images for: The A179L Gene of African Swine Fever Virus Suppresses Virus-Induced Apoptosis but Enhances Necroptosis
Source: MDPI journal article supplement (doi:10.3390/v13122490), 2021-12-13

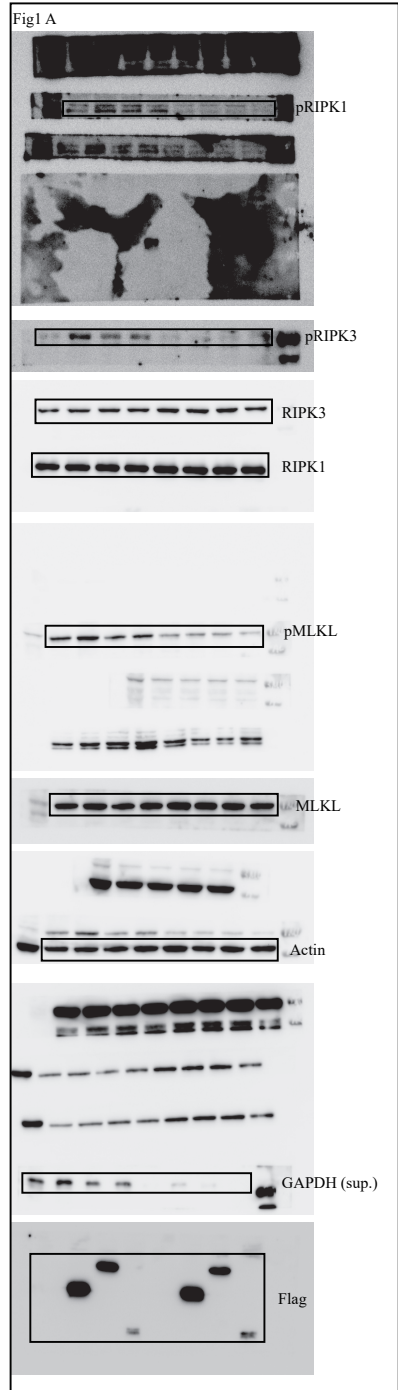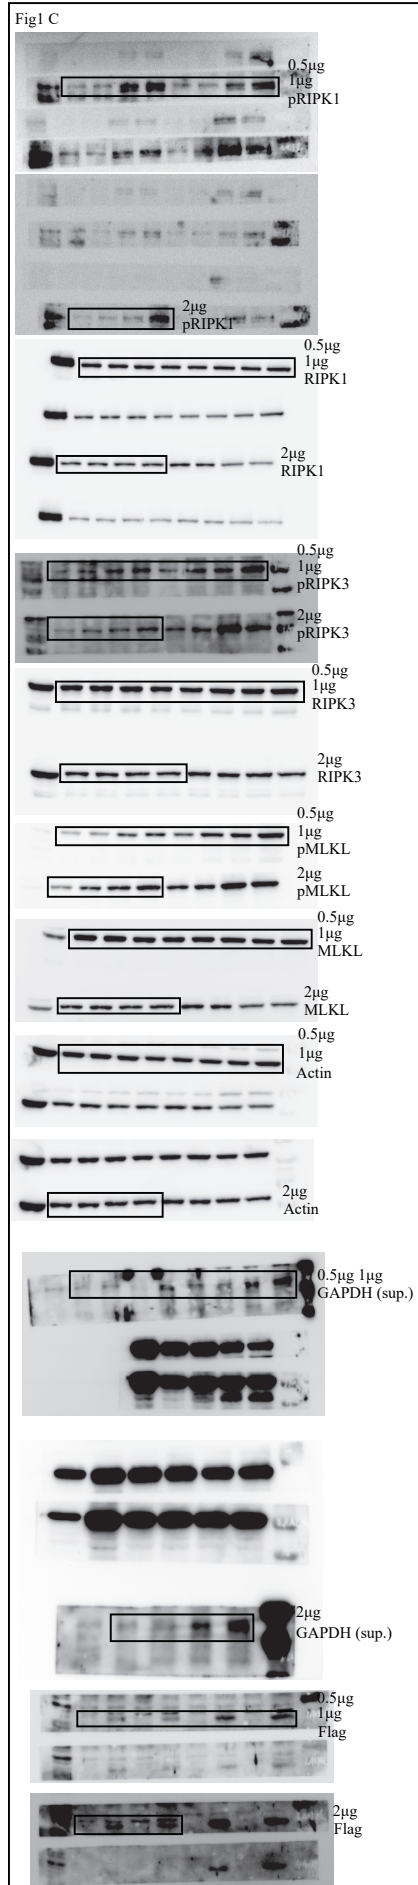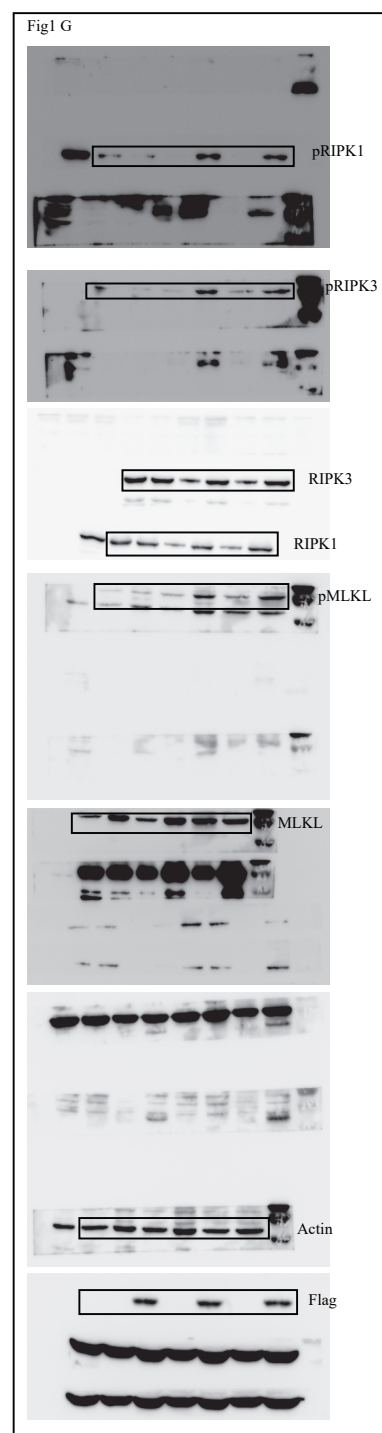

Fig2 A

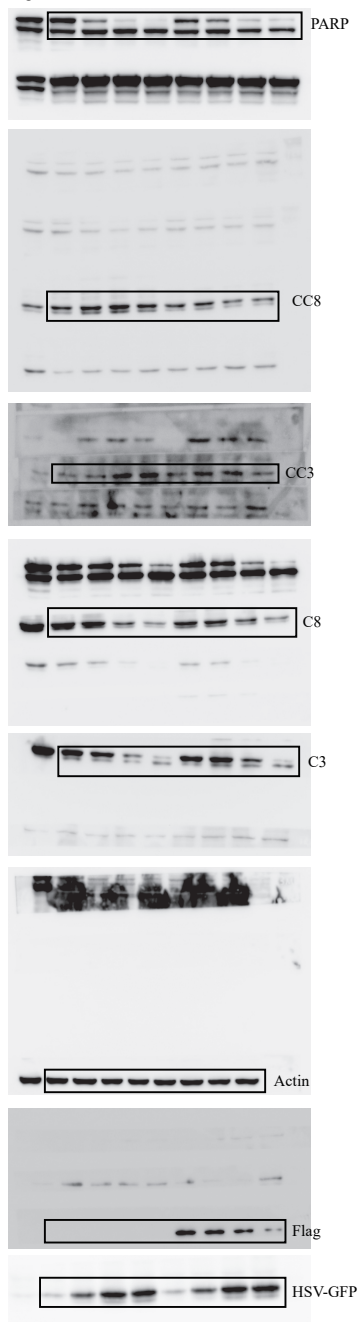

Fig3 A

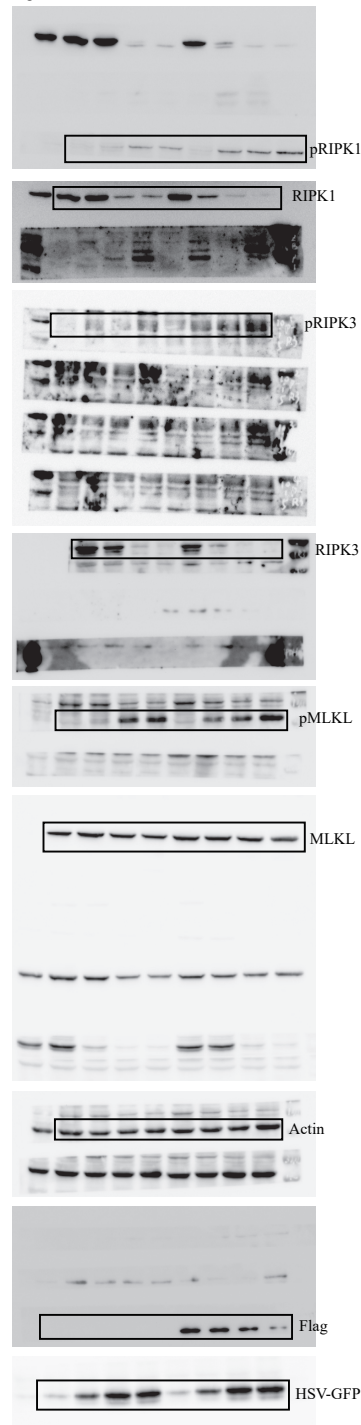

Fig4 A

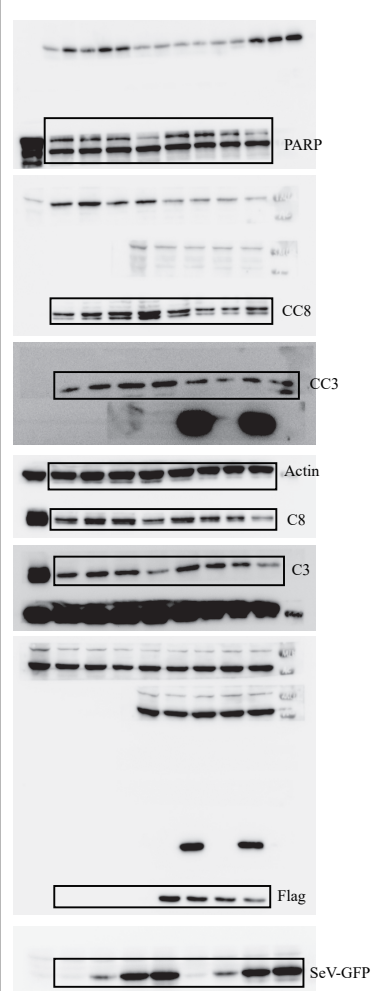

Fig5 A

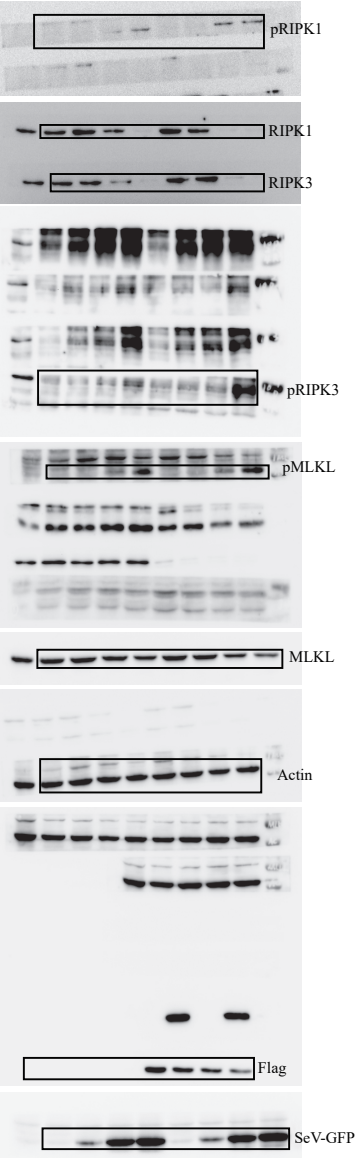

Fig6 A

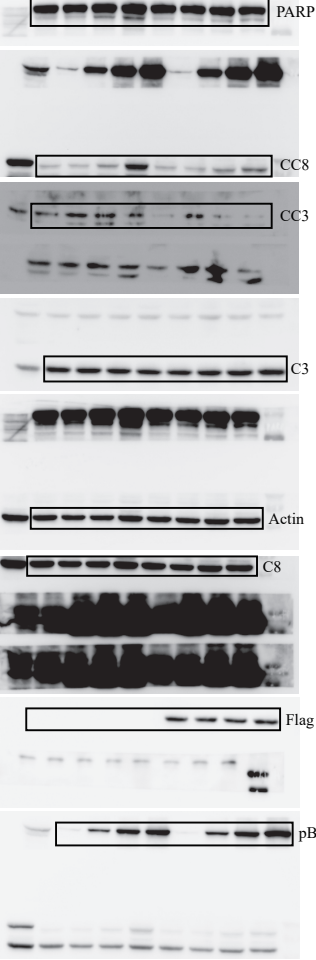

Fig7 A

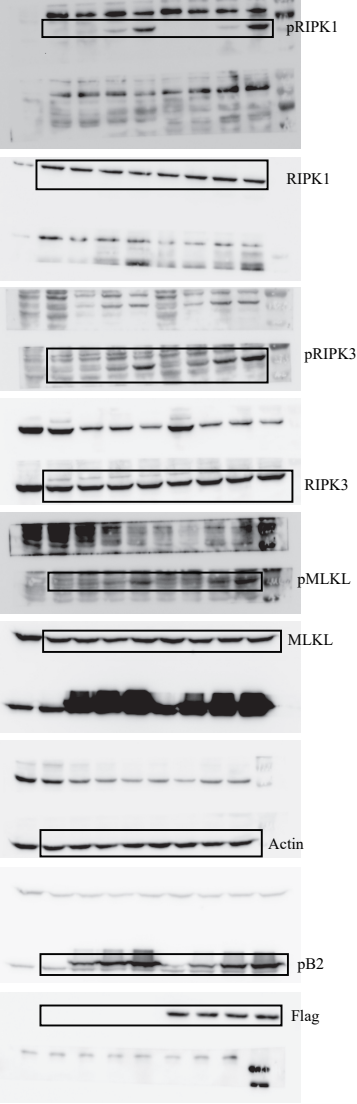

Supplement: s1 [file s1]
